# Supplementary material for: Stimulatory Effects of Cinnamon Extract (Cinnamomum cassia) during the Initiation Stage of 3T3-L1 Adipocyte Differentiation
Source: MDPI journal article supplement (doi:10.3390/foods5040083), 2016-12-06
Supplement: s1 [file s1]

## Supplementary Materials: Stimulatory Effects of Cinnamon Extract (*Cinnamomum cassia*) during the Initiation Stage of 3T3-L1 Adipocyte Differentiation

Sang Gil Lee, Joanna A. Siaw and Hye Won Kang

**Table S1.** F-values in the statistical analysis for gene expressions level by cinnamon extract (CE) treatments <sup>1</sup>.

| Genes         | CE Treatment Stage |            |           |
|---------------|--------------------|------------|-----------|
|               | Pre-Adipocyte      | Initiation | Adipocyte |
| PPAR $\gamma$ | 1.47               | 5.34       | 6.54      |
| CEBP $\alpha$ | 4.89               | 11.96      | 1.49      |
| CEBP $\beta$  | 1.14               | 53.58      | 8.06      |
| SREBP1c       | 10.45              | 6.27       | 1.04      |
| FAS           | 2.87               | 11.58      | 14.04     |
| ACC           | 4.41               | 7.60       | 0.89      |
| CPT1 $\alpha$ | 13.34              | 15.96      | 1.68      |
| UCP1          | 3.47               | 0.15       | 7.15      |
| PRDM16        | 6.28               | 0.08       | 6.37      |

<sup>1</sup> Degrees of freedom in the analysis is 3.

**Table S2.** Nutritional components of 100 g cinnamon extract (CE) powder.

| Component                    | Amount (g) |
|------------------------------|------------|
| Protein                      | 11         |
| Fat Acid                     | 5          |
| Carbohydrates                | 12         |
| Cellulose                    | 13         |
| Vitamin E                    | 7          |
| Manganese                    | 9          |
| Potassium                    | 11         |
| Calcium                      | 15         |
| Phosphorus                   | 1          |
| Sodium                       | 1          |
| Selenium                     | 1          |
| Iron                         | 1          |
| Water                        | 3          |
| Total phenolics <sup>1</sup> | 14.1       |

<sup>1</sup> Total phenolic amounts were measured by the Folin-Ciocalteu method and expressed as g gallic acid equivalent/100 g of CE powder.
